# Supplementary material for: Band gap engineered, oxygen-rich TiO2 for visible light induced photocatalytic reduction of CO2
Source: Royal Society of Chemistry journal article supplement (doi:10.1039/c4cc01304b), 2014-01-01
Supplement: c4cc01304b1.pdf [file c4cc01304b1.pdf]

Electronic Supplementary Information (ESI) for

**Band gap engineered, oxygen-rich TiO<sub>2</sub> for visible light induced photocatalytic  
reduction of CO<sub>2</sub>**

Lling-Lling Tan,<sup>a</sup> Wee-Jun Ong,<sup>a</sup> Siang-Piao Chai\*<sup>a</sup> and Abdul Rahman Mohamed<sup>b</sup>

<sup>a</sup>Low Carbon Economy (LCE) Group, Chemical Engineering Discipline, School of Engineering, Monash University, Jalan Lagoon Selatan, 46150 Bandar Sunway, Selangor, Malaysia.

<sup>b</sup>Low Carbon Economy (LCE) Group, School of Chemical Engineering, Universiti Sains Malaysia, Engineering Campus, Seri Ampangan, 143000 Nibong Tebal, Pulau Pinang, Malaysia.

\*Corresponding author:

Tel: +603-5514 6234; Fax: +603-5514 6207

E-mail address: [chai.siang.piao@monash.edu](mailto:chai.siang.piao@monash.edu)

## **(1) Detailed experimental procedures**

**Chemicals.** All chemicals were of analytical reagent-grade and deionized water was used throughout the experiment. Titanium (IV) butoxide (TBT),  $C_{16}H_{36}O_4Ti$  (Sigma Aldrich Malaysia, > 97.0% purity) was used as the titania precursor. Hydrogen peroxide,  $H_2O_2$  (R&M Chemicals, 30%) was used as the chemical modifier. Pure anatase  $TiO_2$  nanopowder (Sigma Aldrich Malaysia, > 98.0%) and Degussa P25 were used as the control semiconductor photocatalysts. All chemicals were used as received without any further purification.

**Synthesis of  $O_2-TiO_2$ .** In a typical synthesis, TBT (5.5 mL) was added into 150 mL of cold water (5 °C) to form hydrolyzed titanium species. The precipitate obtained was repeatedly washed with water and stirred with  $H_2O_2$  (80 mL) for 1 h to form a peroxo-titanate complex. The solution, on heating at 50 °C for 3 h underwent gelation, which was then dried in an air oven at 100 °C for 24 h. The yellowish solid material obtained was then subjected to calcination at 400 °C for 2 h at a heating rate of 10 °C/min, before characterization.

**Characterization techniques.** The surface morphology and chemical composition of the as-synthesized  $O_2-TiO_2$  sample were analyzed by a field emission scanning electron microscopy (FESEM) (Hitachi SU8010) equipped with an Oxford-Horiba Inca XMax50 energy dispersive X-ray (EDX). High resolution transmission electron microscopy (HRTEM) images were taken with a JEOL JEM-2100F microscope operating at 200 kV. The TEM sample was prepared by depositing a drop of diluted suspension in ethanol on a lacey-film-coated copper grid. Raman spectra were recorded at room temperature on a Renishaw inVia Raman Microscope in the back-scattering geometry with  $Ar^+$  laser excitation at 514 nm in the range of 100-3000  $cm^{-1}$ . The X-Ray powder diffraction (XRD) data were obtained on a Bruker AXS D8 Advance X-Ray diffractometer with  $Cu K\alpha$  radiation ( $\lambda = 0.15406$  nm) at a scan rate ( $2\theta$ ) of  $0.02^\circ s^{-1}$ . The accelerating voltage and applied current were 40 kV and 40 mA,

respectively. The lattice parameters of anatase TiO<sub>2</sub> *a* and *c* were calculated from (101) and (200) reflections of the XRD pattern using Eq. 1, where *h*, *k*, *l* are the miller indices and *d* is the interplanar spacing calculated from the 2θ angle using the Bragg's Law (Eq. 2). The amount of rutile phase in O<sub>2</sub>-TiO<sub>2</sub> and P25 were calculated using Spurr Equation (Eq. 3), where *F<sub>R</sub>* is the amount of rutile in an anatase-rutile mixture, *I<sub>A</sub>* (101) and *I<sub>R</sub>* (110) are the anatase and rutile main peak intensities, respectively.

$$\frac{1}{d^2} = \frac{h^2 + k^2}{a^2} + \frac{l^2}{c^2} \quad (1)$$

$$d = \frac{\lambda}{2 \sin \theta} \quad (2)$$

$$F_R = \frac{1}{1 + 0.8[I_A(101)/I_R(110)]} \quad (3)$$

The X-ray photoelectron spectroscopy (XPS) wide and narrow scan spectra were acquired using AXIS Ultra DLD, Kratos, equipped with an Al Kα X-ray source (1486.6 eV) at 10 mA, 15 kV, analyzing 300 μmm x 700 μmm area under 3.1 x 10<sup>-9</sup> torr ultra vacuum environment. The spectra were analyzed using vision software which included vision manager and vision processing. All spectra were charge corrected by means of adventitious carbon signal (C 1s) at 284.6 eV. The linear method was used for background subtraction and curve fitting. Ultraviolet-visible (UV-Vis) absorbance spectra were obtained using a UV-Vis spectrophotometer (Agilent, Cary 100) equipped with an integrated sphere. The absorbance spectra of the photocatalysts were analyzed under ambient temperature in the wavelength ranging from 300-800 nm. The band gap energies of the photocatalysts were determined from the Kubelka-Munk function, *F(R)* and the extrapolation of Tauc plot which is a plot of  $[F(R).h\nu]^{1/2}$  versus *hν*. A Nicolet iS10 FTIR spectrometer was used for recording the FTIR spectra of the H<sub>2</sub>O<sub>2</sub>-modified (oxygen-rich) and control TiO<sub>2</sub> intermediate.

**Photocatalytic CO<sub>2</sub> reduction experiment.** The photocatalytic experiment for the reduction of CO<sub>2</sub> was conducted at ambient condition in a homemade, continuous gas flow reactor. Highly pure CO<sub>2</sub> (99.999%) was bubbled through water (sacrificial reagent) to produce a mixture of CO<sub>2</sub> and water vapor into the photoreactor at atmospheric pressure. The flow rate of CO<sub>2</sub> was fixed at 5 ml/min. Prior to irradiation, CO<sub>2</sub> was purged through the quartz tube loaded with coated photocatalysts (O<sub>2</sub>-TiO<sub>2</sub>, ATiO<sub>2</sub>) on glass rods for 30 min to remove any excess air and to ensure complete adsorption of gas molecules. The visible light source was then turned on to initiate the photocatalytic reaction. The reactant gas was in contact with the photocatalyst under the illumination of 15-W energy-saving daylight bulbs (8.6 mW/cm<sup>2</sup>) to provide a full spectrum emission without any filter to simulate the sunlight source. The experimental set-up is illustrated in Fig. S1. The generated gases were collected at 1 h intervals and were analyzed by an Agilent 7890A gas chromatograph (GC), equipped with a flame ionization detector (FID). The CH<sub>4</sub> product yield was calculated using Eq. 4. Control experiments were conducted under N<sub>2</sub>/H<sub>2</sub>O flow as well as in dark condition (without irradiation of light source) to ensure that the CH<sub>4</sub> product formed was due to the photoreduction of CO<sub>2</sub>.

$$\text{Yield } \left( \mu\text{mol CH}_4 \text{ g}_{\text{cat}}^{-1} \text{ h}^{-1} \right) = \frac{(C_{\text{final,CH}_4} - C_{\text{initial,CH}_4}) \times \text{volumetric flow rate of product gas}}{\text{mass of photocatalysts used}} \quad (4)$$

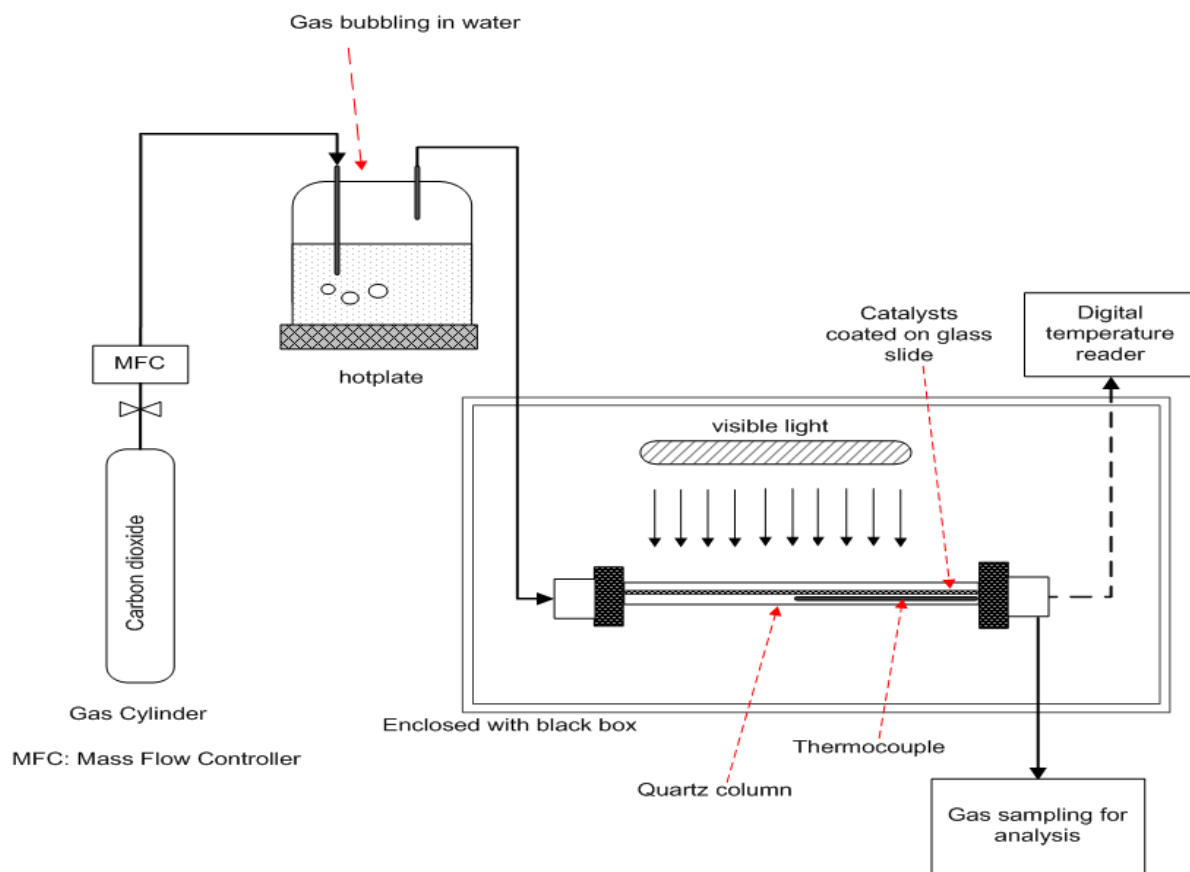

**Fig. S1** Experimental set-up for the photocatalytic reduction of CO<sub>2</sub> under visible light irradiation

## (2) Control experiments

Additional experiments were performed to verify that the band gap narrowing and photocatalytic enhancement of O<sub>2</sub>-TiO<sub>2</sub> were due to the presence of oxygen excess defects. Using XRD patterns (Fig. S2) and the Spurr Equation (Eq. 3), the fraction of rutile phase, F<sub>R</sub> present in O<sub>2</sub>-TiO<sub>2</sub> (F<sub>R</sub> = 0.356) was found to be close to that of the commercial Degussa P25 (F<sub>R</sub> = 0.350). UV-Vis characterizations were then repeated for both P25 and pure rutile TiO<sub>2</sub>, and were compared with O<sub>2</sub>-TiO<sub>2</sub>. From Fig. S3A, O<sub>2</sub>-TiO<sub>2</sub> showed an obvious red shift at the absorption edge, indicating a narrowing of band gap, which was confirmed using a Tauc plot of the modified Kubelka-Munk (KM) function (Fig. S3B). O<sub>2</sub>-TiO<sub>2</sub> exhibited the lowest band gap of 2.95 eV, while P25, ATiO<sub>2</sub> and pure rutile had estimated band gaps of 3.25, 3.20 and 3.00 eV, respectively.

In addition, the photocatalytic reduction of CO<sub>2</sub> was also repeated using the commercial P25 photocatalyst (see Fig. 4 in manuscript). It was observed that P25 exhibited low photoactivity towards the conversion of CO<sub>2</sub> under visible light. The O<sub>2</sub>-TiO<sub>2</sub> sample showed an enhancement factor of 5.2 over P25. As the fraction of rutile phase in O<sub>2</sub>-TiO<sub>2</sub> was close to that of P25, we can confirm that the band gap narrowing and photocatalytic enhancement were attributed to the oxygen-rich nature of our final product.

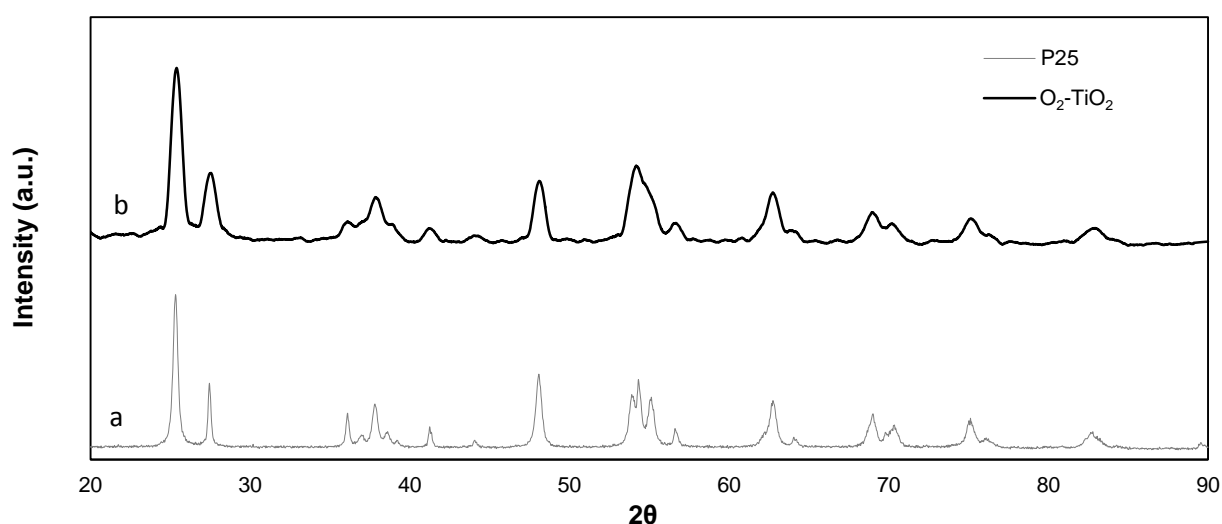

**Fig. S2** XRD patterns of (a) P25 and (b) O<sub>2</sub>-TiO<sub>2</sub> photocatalysts.

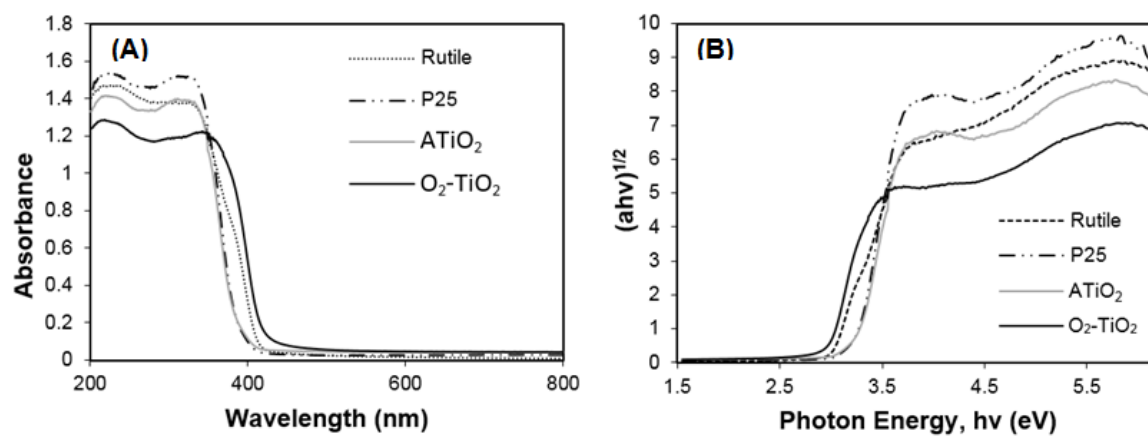

**Fig. S3** (A) UV-Vis DRS and (B) plot of the transformed KM function for rutile, P25, ATiO<sub>2</sub> and O<sub>2</sub>-TiO<sub>2</sub>.

### (3) FTIR spectra of the peroxy-titanate complex

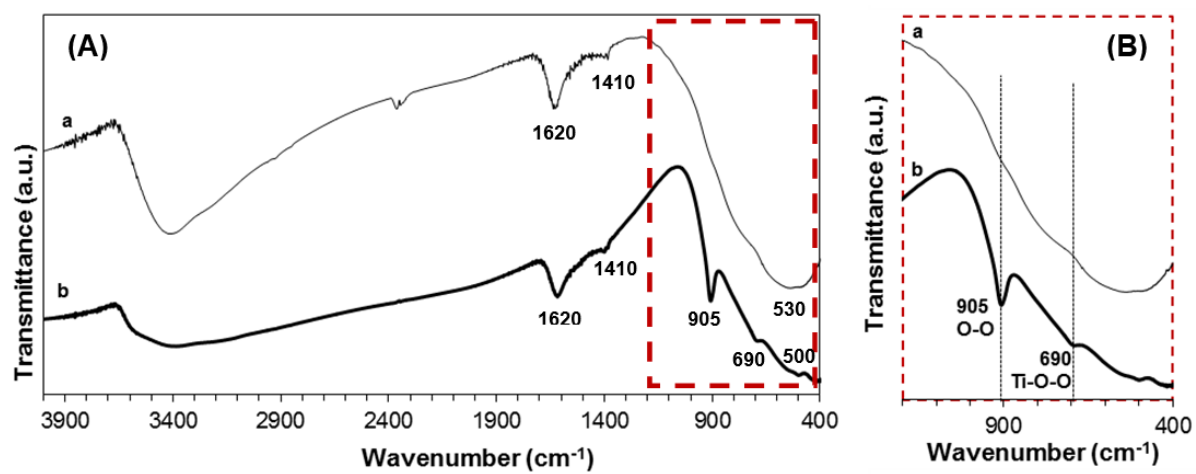

**Fig. S4** (A) FTIR spectrum of 100 °C dried TiO<sub>2</sub> precursor: (a) control and (b) H<sub>2</sub>O<sub>2</sub>-modified TiO<sub>2</sub> intermediate, (B) Enlarged spectra for wavenumber range 400-1200 cm<sup>-1</sup>.



**(4) TEM and HRTEM images of ATiO<sub>2</sub>**

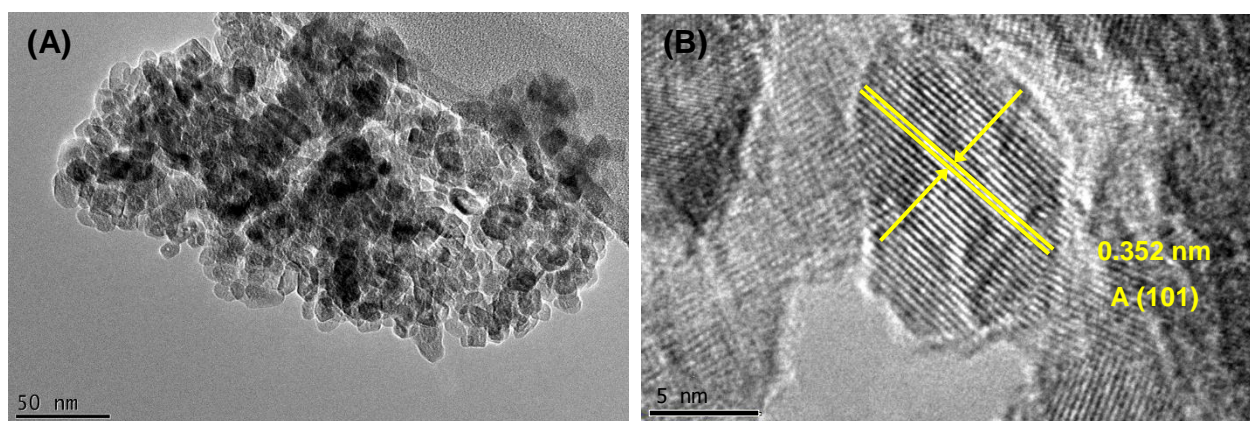

**Fig. S5** (A) TEM and (B) HRTEM images of ATiO<sub>2</sub>.

(5) Atomic structures of  $\text{ATiO}_2$  and  $(\text{O}_2)_\text{o}$

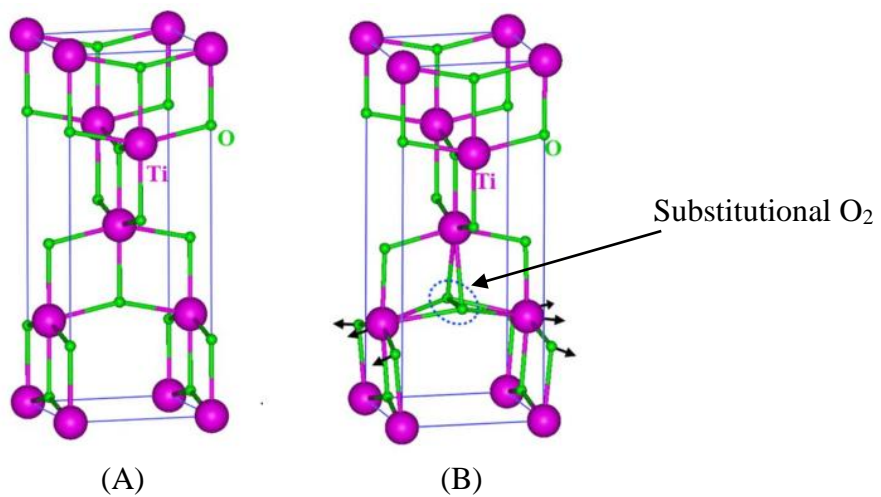

**Fig. S6** Atomic structures of (A)  $\text{ATiO}_2$  and (B)  $(\text{O}_2)_\text{o}$ .<sup>1</sup>

**(6) Light spectrum of daylight bulb used in photocatalytic experiments**

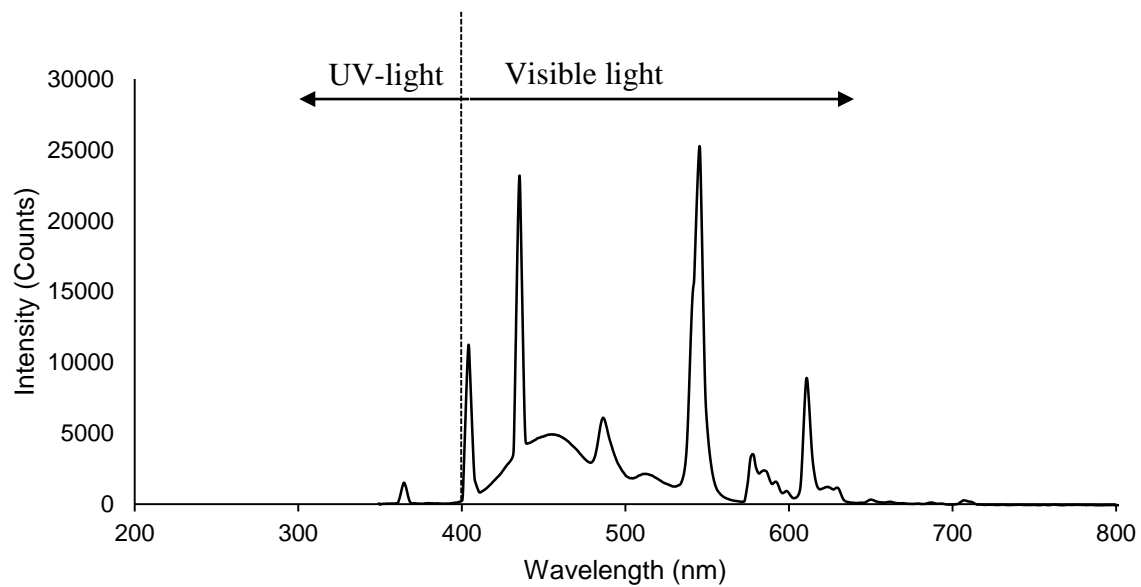

**Fig. S7** Light spectrum of the daylight bulb used in the photoreduction of CO<sub>2</sub>.

## (7) Reaction mechanism for the photocatalytic reduction of CO<sub>2</sub> over O<sub>2</sub>-TiO<sub>2</sub>

As discussed in the manuscript, the two primary factors responsible for the high visible light photoactivity of O<sub>2</sub>-TiO<sub>2</sub> are (i) the band gap narrowing effect of the oxygen excess defect and (ii) the enhanced absorption intensity in the visible region. The reaction mechanism over TiO<sub>2</sub> photocatalyst has been studied in our previous reports.<sup>2,3,4</sup> The photocatalytic conversion of CO<sub>2</sub> to CH<sub>4</sub> over the O<sub>2</sub>-TiO<sub>2</sub> photocatalyst can be understood using the energy band theory, which is based on the relative positions of the conduction band (CB), valence band (VB), and redox potentials. The overall mechanism of the CO<sub>2</sub> transformation process is a sequential combination of H<sub>2</sub>O oxidation and CO<sub>2</sub> reduction. In general, photo-excited electrons can be consumed effectively, if the reduction potential of the reaction is lower than the CB potential of the semiconductor. The CB flatband potential of O<sub>2</sub>-TiO<sub>2</sub> (-0.5 V vs. normal hydrogen electrode (NHE), pH = 7)<sup>5</sup> is more negative than the reduction potential of CO<sub>2</sub>/CH<sub>4</sub> (-0.24 V vs. NHE, pH = 7).<sup>6</sup> This indicates that the photogenerated electrons and holes on the irradiated O<sub>2</sub>-TiO<sub>2</sub> can react with adsorbed CO<sub>2</sub> and H<sub>2</sub>O to produce CH<sub>4</sub> via an eight-electron reaction (see Fig. S8). The major reaction steps in the photocatalytic CO<sub>2</sub> reduction process can be summarized by Eq. 5-7.

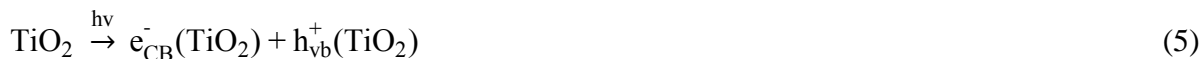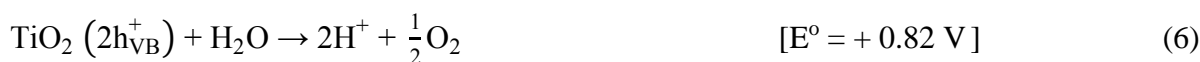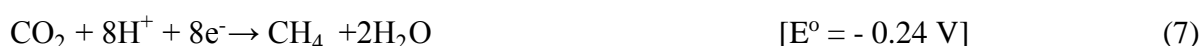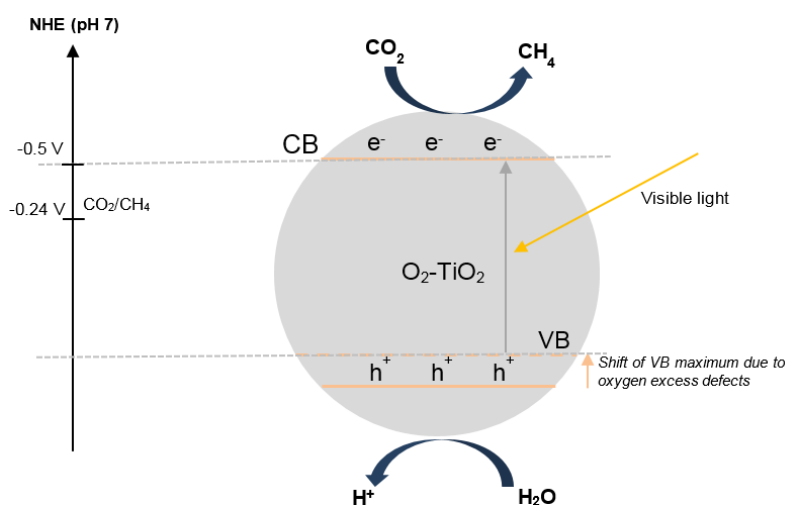

**Fig. S8** The schematic of visible absorption and photocatalytic mechanism in the presence of O<sub>2</sub>-TiO<sub>2</sub> nanoparticles.

## References

- 1 S. Na-Phattalung, M. F. Smith, K. Kim, M.-H. Du, S.-H. Wei, S. B. Zhang and S. Limpijumnong, *Phys. Rev. B*, 2006, **73**, 125205.
- 2 M. M. Gui, S.-P. Chai, B.-Q. Xu and A. R. Mohamed, *Sol. Energy Mater. Sol. Cells*, 2014, **122**, 183.
- 3 W.-J. Ong, M. M. Gui, S.-P. Chai and A. R. Mohamed, *RSC Adv.*, 2013, **3**, 4505.
- 4 L.-L. Tan, W.-J. Ong, S.-P. Chai and A. R. Mohamed, *Nanoscale Res. Lett.*, 2013, **8**, 465.
- 5 Y. Li, W.-N. Wang, Z. Zhan, M.-H. Woo, C.-Y. Wu and P. Biswas, *Appl. Catal., B*, 2010, **100**, 386.
- 6 N. Zhang, S. Ouyang, T. Kako and J. Ye, *Chem. Commun.*, 2012, **48**, 1269.
